# Supplementary material for: Analysing Head-Thorax Choreography During Free-Flights in Bumblebees
Source: Frontiers journal article supplement (doi:10.3389/fnbeh.2020.610029), 2021-01-12
Supplement: Data_Sheet_1.PDF [file Data_Sheet_1.PDF]

# Analysing head-thorax choreography during free-flights of bumblebees, *bombus terrestris*.

## 1 SUPPLEMENTARY TABLES AND FIGURES

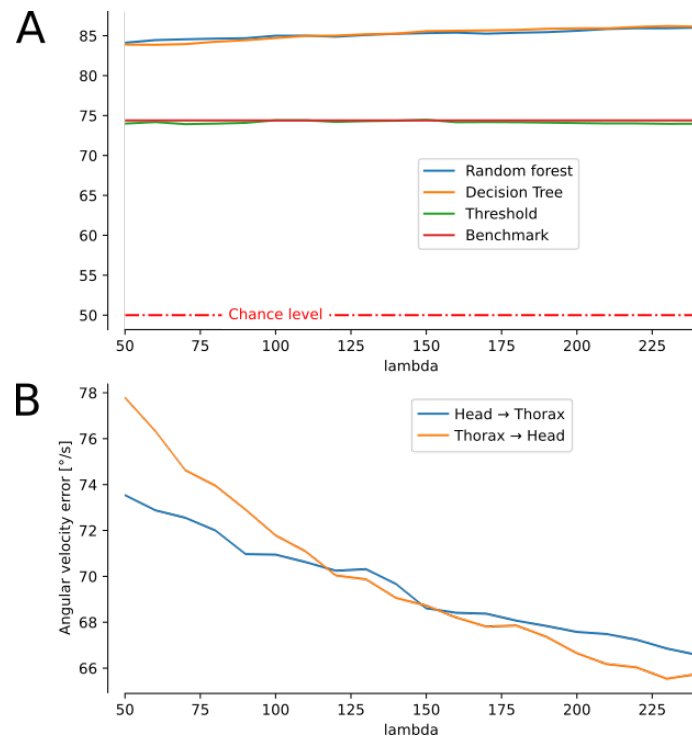

**Figure S1.** Effect of the smoothing parameter  $\lambda$  on the accuracy of the saccade-intersaccade classifier and angular error of the neural network, respectively. The timecourse of the head and thorax orientation was filtered with a cubic spline with parameter  $\lambda$  before developing the two methods. A) To test for the robustness of the saccade-intersaccade classifier against the smoothing parameters  $\lambda$ , we evaluated the accuracy of the classifier (Thresholding, Decision tree, and Random forest) for  $\lambda$  varying between 50 and 250. We observe a slight increase with decreasing  $\lambda$ , and less variance for the Random forest classifier B) We tested the robustness of the neural network in predicting head's velocity from thorax's velocity (and vice versa) for different  $\lambda$ . We observe a decrease in angular error between network prediction and head angular velocity with increasing  $\lambda$ .

**Table S1.** Overview of the parameters used for the two methods, classifier and fore-backcasting.

|                  | Parameter                           | Value/Range                                  |
|------------------|-------------------------------------|----------------------------------------------|
| Filtering        | $\lambda$ (smoothing parameter)     | 150                                          |
| Classifier       | $\Delta t$ (window size)            | $\in \{1, 3, 5, \dots, 53\}$                 |
|                  | $D$ (depth)                         | $\in [1, 20]$                                |
| Fore-backcasting | $\Delta t$ (window size)            | $\in \{1, 3, 5, \dots, 53\}$                 |
|                  | $N$ (number of neurons)             | $\in \{1, 2, 4, 8, 16, 32, 64, 128\}$        |
|                  | $\lambda$ (regularization term)     | 0.5                                          |
|                  | $\epsilon$ (avoid division by zero) | 0.1                                          |
|                  | $\tau$ (temporal-shift)             | $\in \{-25, -23, \dots, 23, 25\} \cup \{0\}$ |

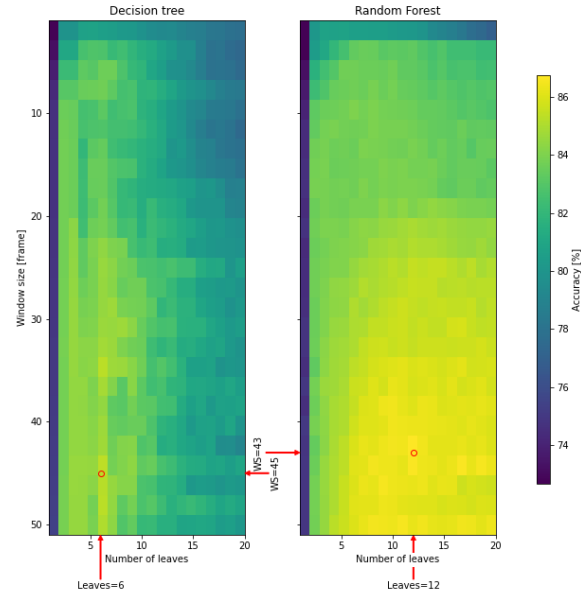

**Figure S2.** Accuracy of the Decision tree and Random forest on the validation datasets for different parameters. The windows size  $\Delta t$  was varied in 1, 3, 5, ..., 53 (x-axis), and the depth of the trees  $D$  was varied from 1 to 20 (y-axis). Color represent the accuracy on the validation datasets. The red dot indicate the chosen parameter  $\Delta t$  and  $D$  for evaluating the model on the test set.
